# Supplementary material for: XRD/Raman spectroscopy studies of the mechanism of (de)intercalation of Na+ from/into highly crystalline birnessite
Source: Royal Society of Chemistry journal article supplement (doi:10.1039/d1ma00161b), 2021-01-01
Supplement: d1ma00161b1.pdf [file d1ma00161b1.pdf]

**Electronic supporting information, ESI**

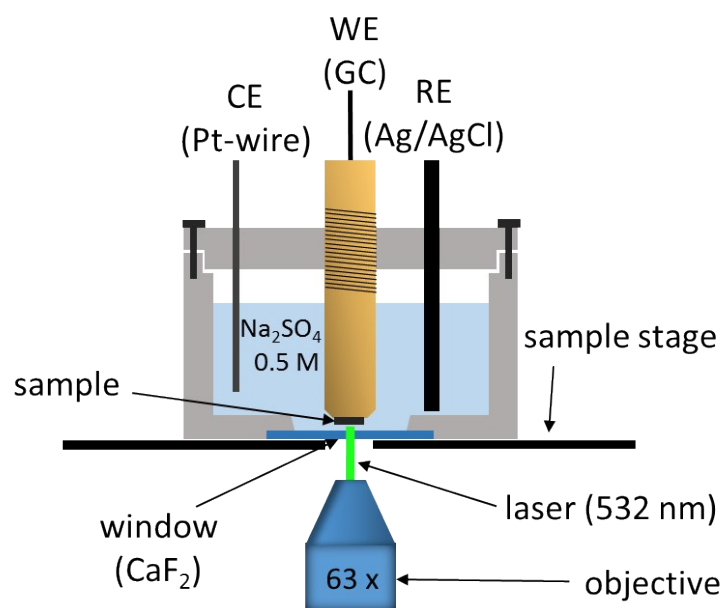

**Figure S 1.** Sctch of the *in situ* Raman measuring cell.

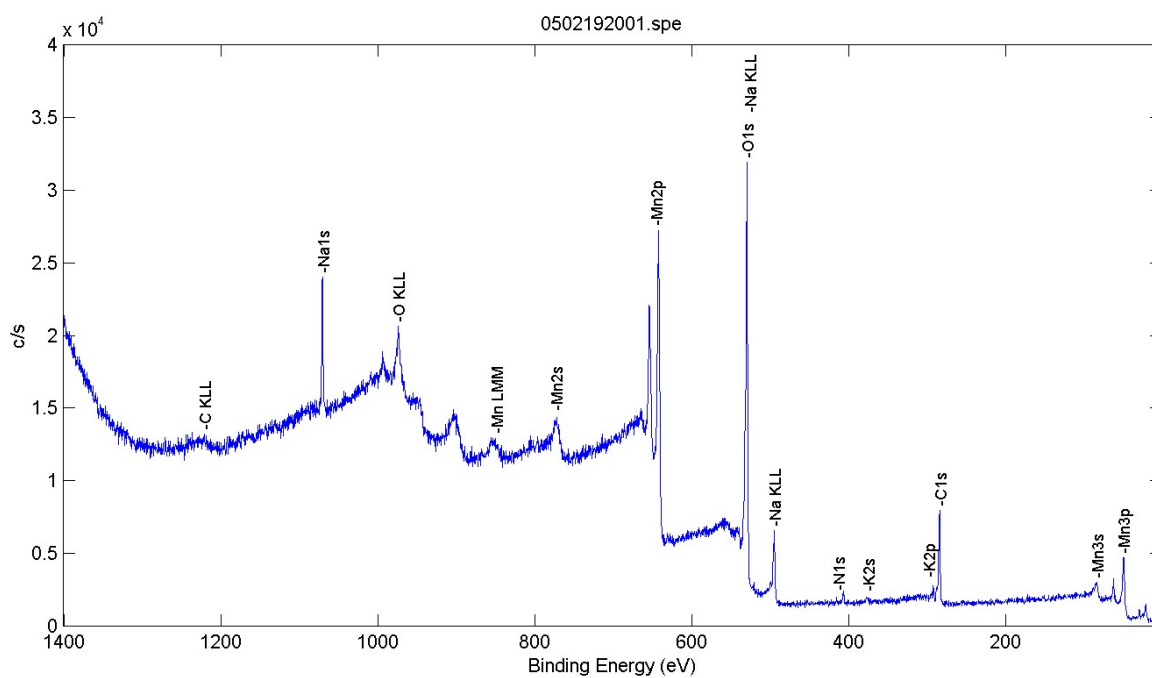

**Figure S 2.** XPS-spectrum of Li,Na,K-bir.

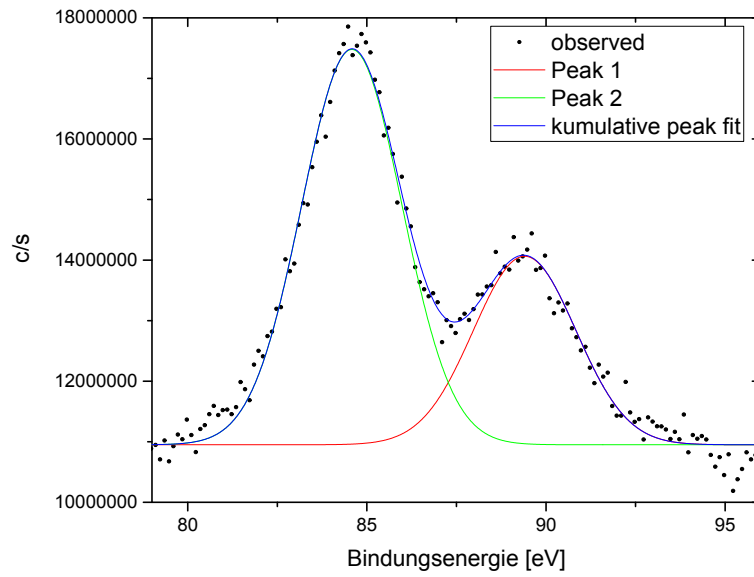

**Figure S 3.** Detail view of the  $Mn_{3s}$  peaks of Li,Na,K-bir.  $\Delta E_{Mn3s} = 4,82$  eV.

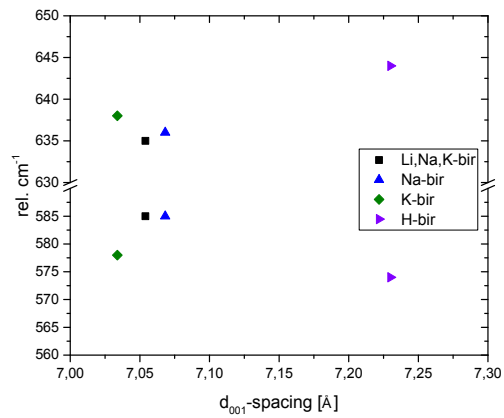

**Figure S 4.** Korrelation between  $d_{001}$ -spacing and spectral position of  $\nu_1$  and  $\nu_2$ .

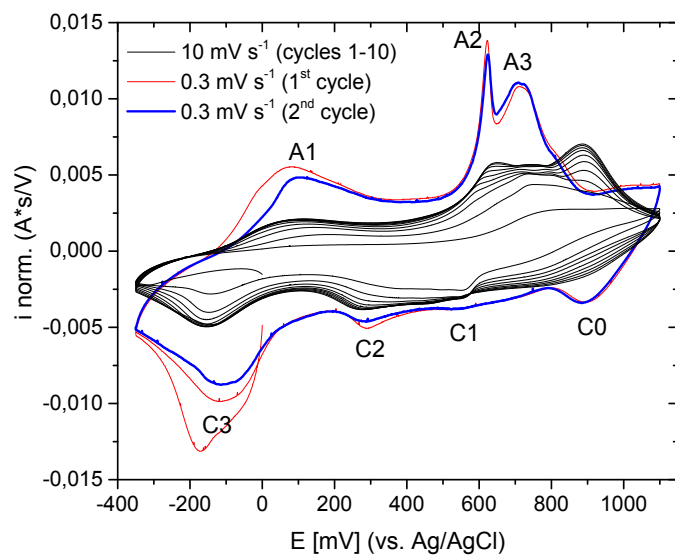

**Figure S 5.** Normalized Cyclic voltammograms of Li,Na,K-bir in 0.5 M Na<sub>2</sub>SO<sub>4</sub> aqueous electrolyte (potential window: -350 mV – 1100 mV (vs. Ag/AgCl)) measured at different scan rates. Electrochemical activation at 10 mV s<sup>-1</sup> (black) and 0.3 mV s<sup>-1</sup> (red and blue).

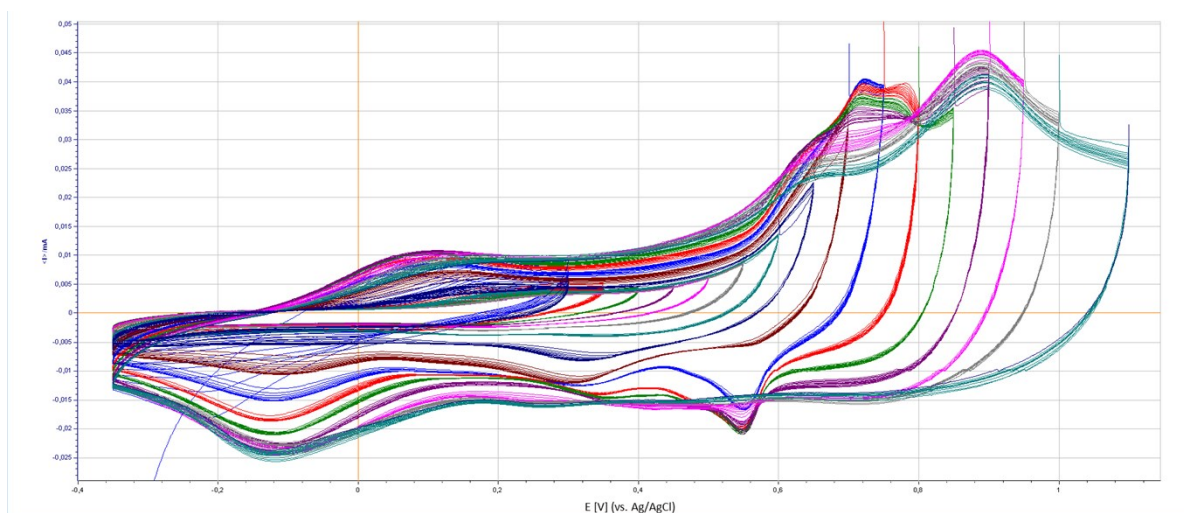

**Figure S 6.** Dependence of the electrochemical behaviour of Li,Na,K-bir on the applied potential window. Lower reverse potential always -350 mV (vs. Ag/AgCl). Gradual increase of the upper reversal potential to 1100 mV. Electrolyte: Na<sub>2</sub>SO<sub>4</sub> (0.5 M). Scan rate 10 mV s<sup>-1</sup>.

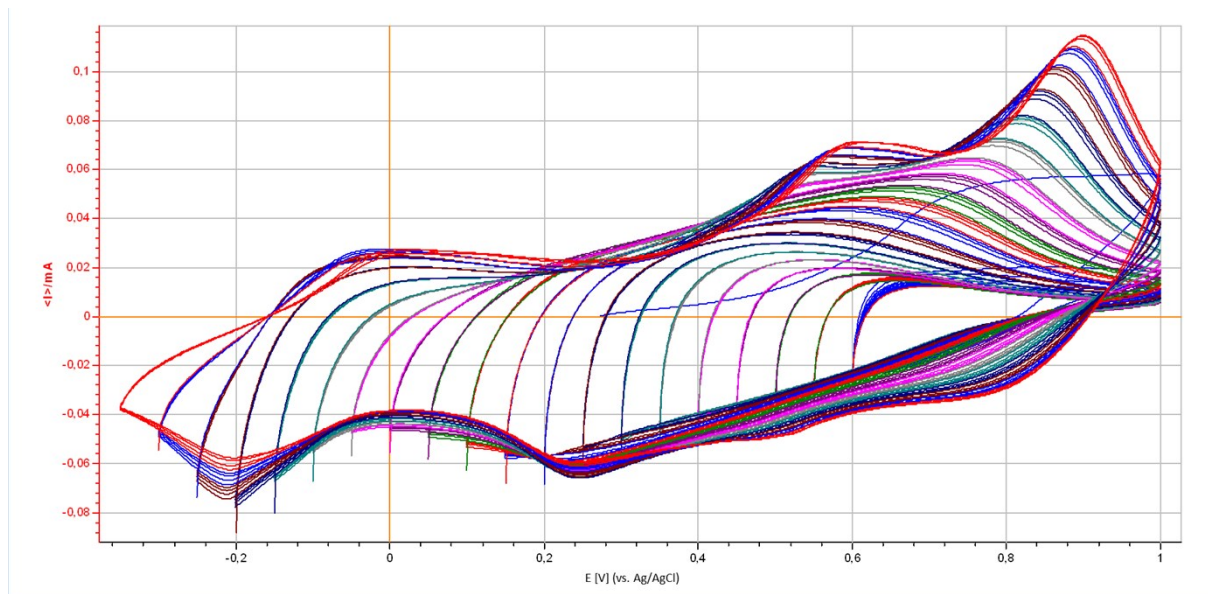

**Figure S 7.** Dependence of the electrochemical behaviour of Li,Na,K-bir on the applied potential window. Upper reverse potential always 1000 mV (vs. Ag/AgCl). Gradual increase of the upper reversal potential to 1100 mV. Electrolyte:  $\text{Na}_2\text{SO}_4$  (0.5 M). Scan rate  $10 \text{ mV s}^{-1}$ .

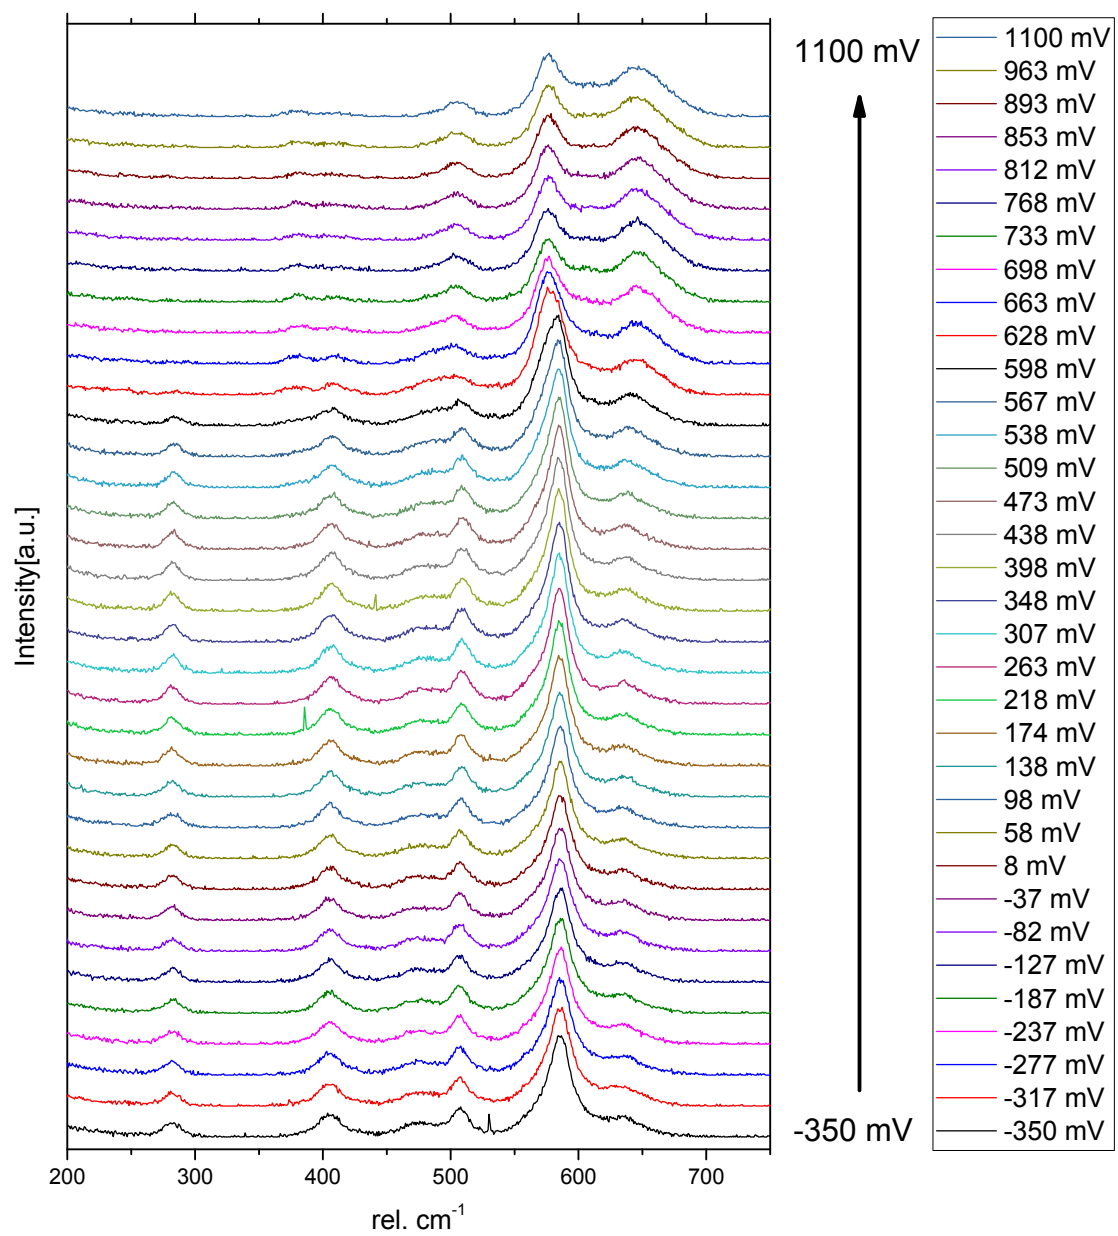

**Figure S 8.** Potential dependent evolution of the Raman spectra during positive-going potential scan.

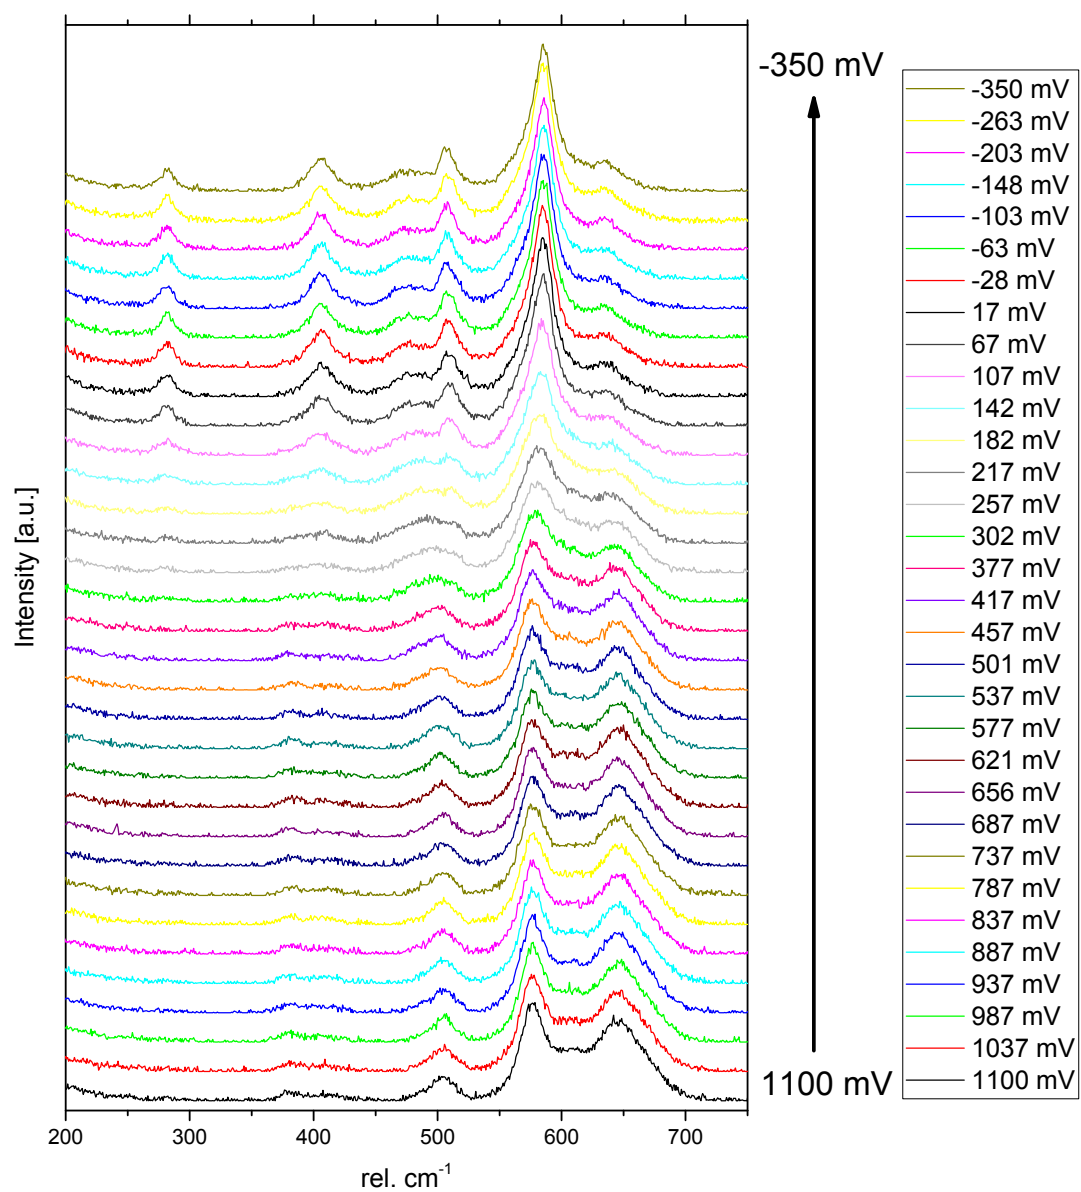

**Figure S 9.** Potential dependent evolution of the Raman spectra during negative-going potential scan.

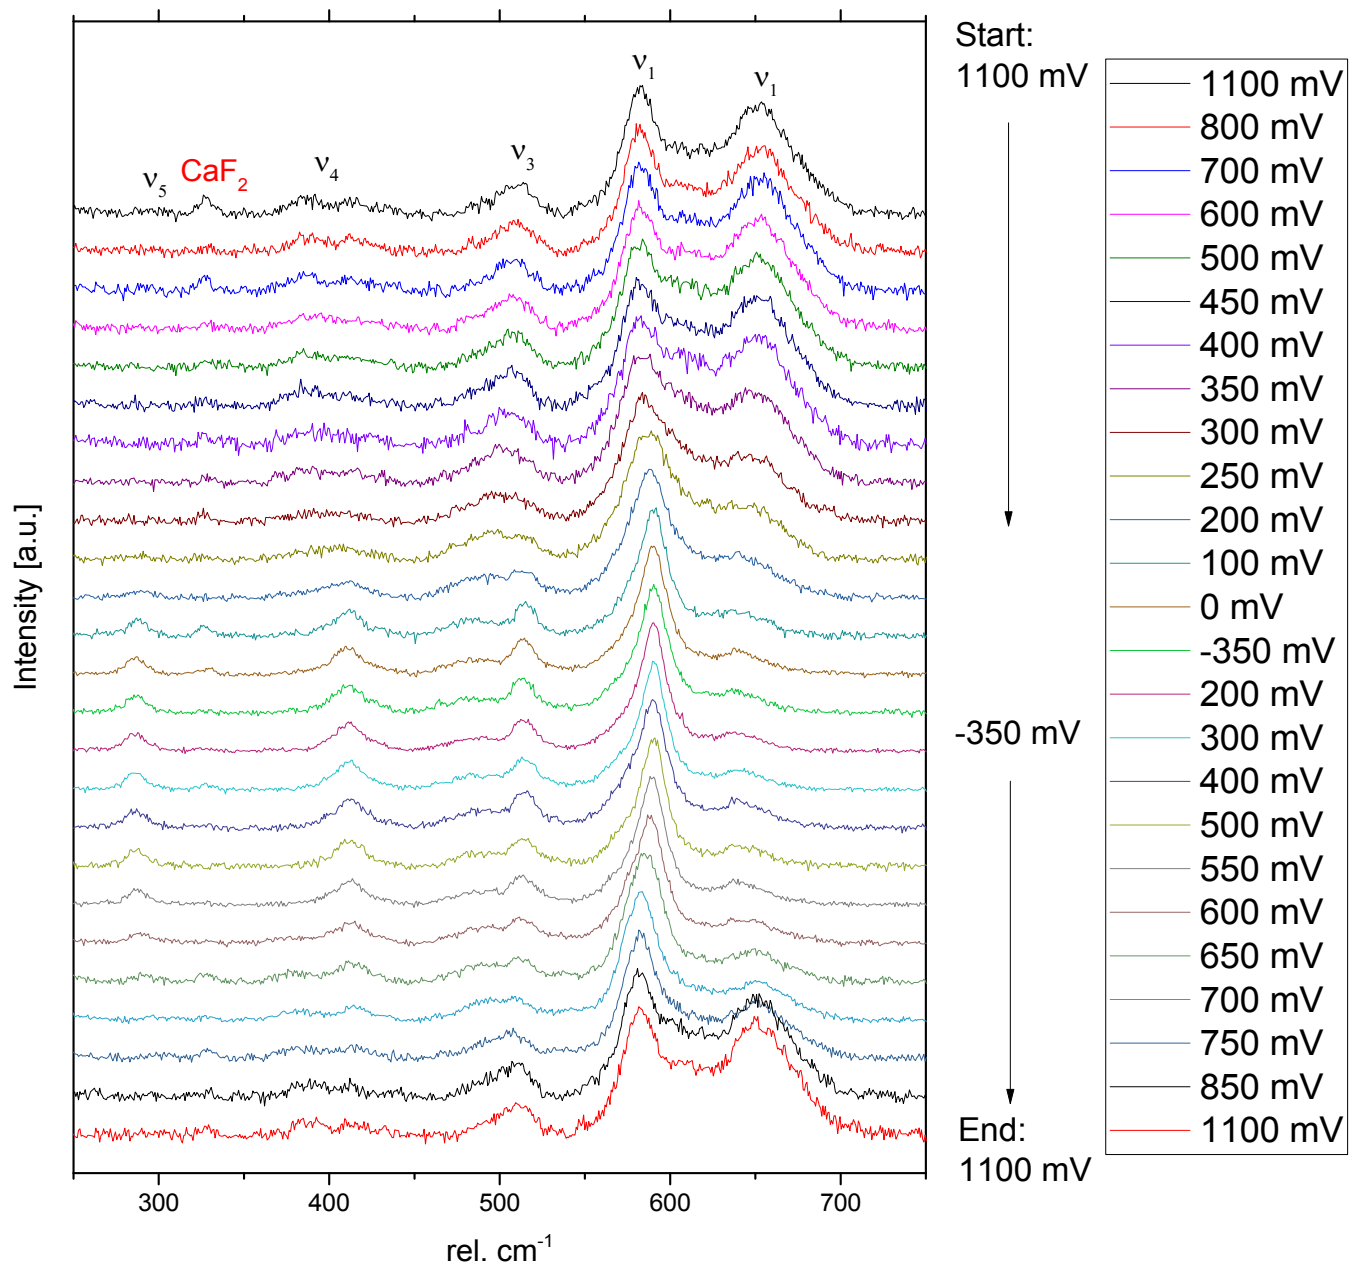

**Figure S 10.** Potential dependent evolution of the Raman spectra (normalized to the intensity of  $\nu_1$ ) during ex situ measurements.

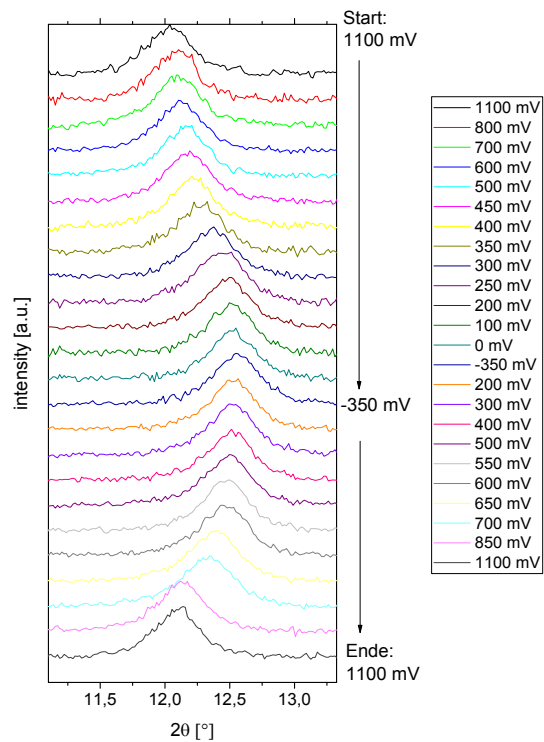

Figure S 11. Potential dependent evolution of the  $d_{001}$ -spacing

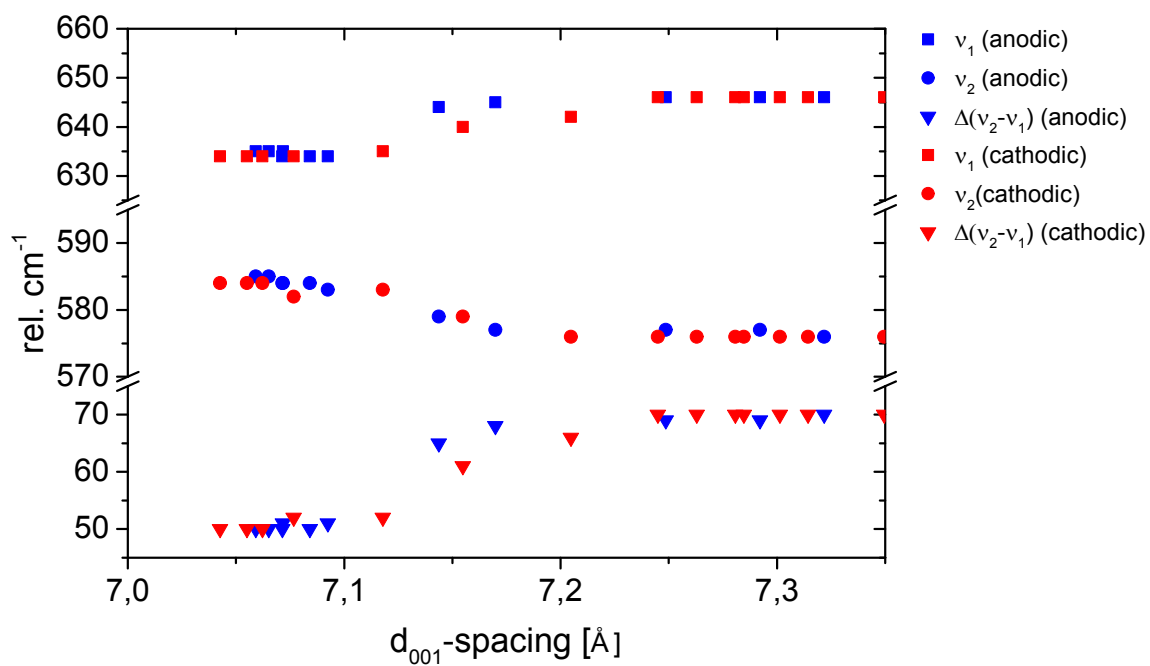

Figure S 12. Correlation between positions of  $\nu_1$ ,  $\nu_2$  and  $\Delta(\nu_1-\nu_2)$  and the  $d_{001}$ -spacing.



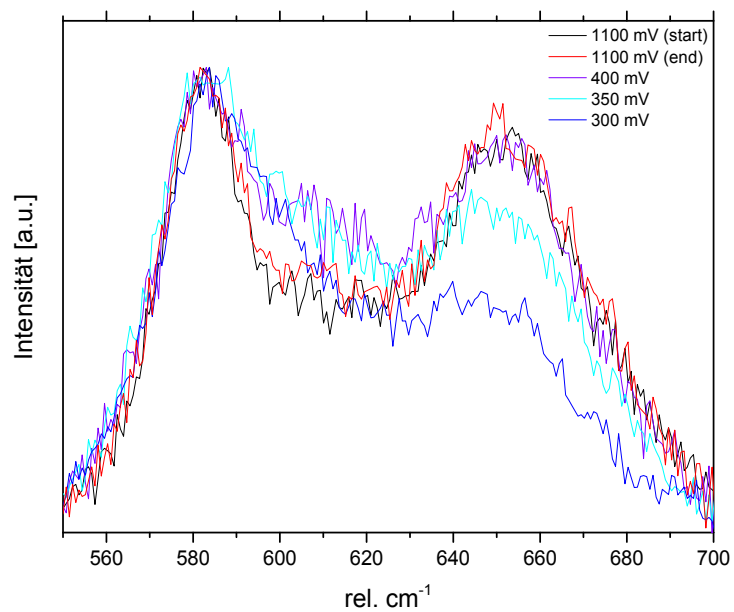

**Figure S 13.** Selected Raman spectra obtained from *ex situ* Raman measurements in 0.5 M Na<sub>2</sub>SO<sub>4</sub>. Normalized to the intensity of  $\nu_2$ .
